# Supplementary material
Source: HighWire-hosted journal article supplement (http://ajnr-stage2.highwire.org/highwire/filestream/182979/field_highwire_adjunct_files/0/20-00245.pdf)
Supplement: 20-00245.pdf [file 20-00245.pdf]

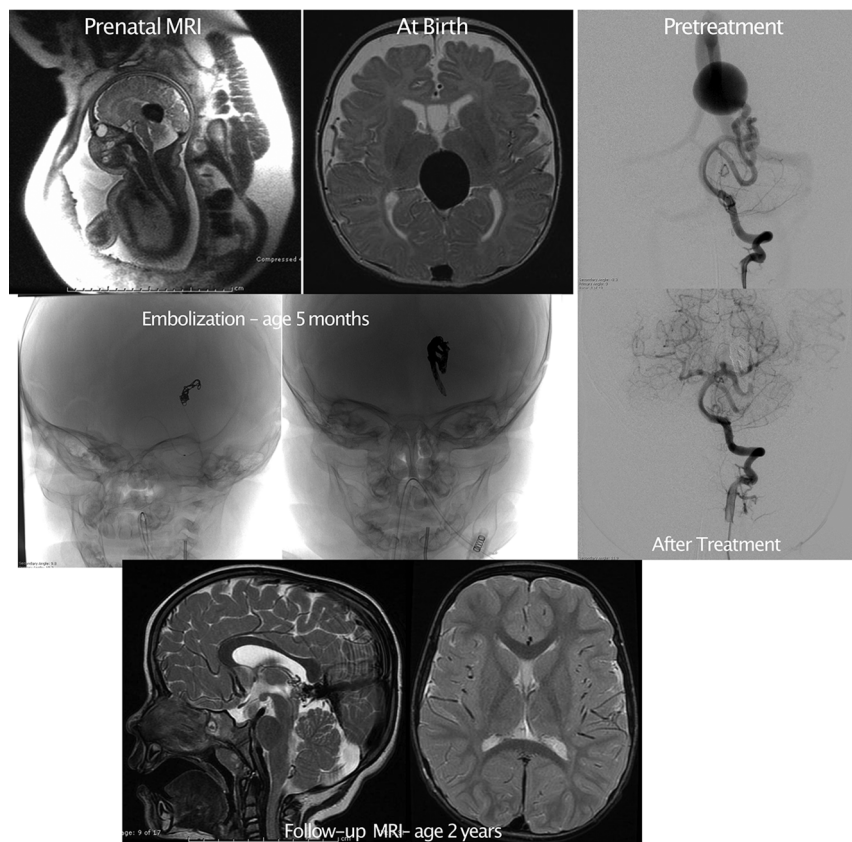

**ON-LINE FIGURE.** Example of a patient from the IT cohort, embolized at 5 months of age. Example of a patient with VOGM diagnosed in utero who was stable at birth and was discharged home from the neonatal intensive care unit, to return for elective embolization of the malformation at 5 months of age. Note that this patient had quite a large median prosencephalic venous varix at presentation, but the size of the varix was not a negative prognosticator. Rather, the narrow falcine sinus drainage was consistent with the clinical presentation as IT.
